# Supplementary material for: Aqueous thermogalvanic cells with a high Seebeck coefficient for low-grade heat harvest
Source: PubMed Central journal article supplement (PMC6279834; doi:10.1038/s41467-018-07625-9), 2018-12-04
Supplement: 41467_2018_7625_MOESM2_ESM.pdf [file 41467_2018_7625_MOESM2_ESM.pdf]

## **Description of Additional Supplementary Files**

File Name: Supplementary Movie 1

Description: Powering LED arrays directly.

File Name: Supplementary Movie 2

Description: Mechanical properties of the modules.
